# Supplementary material for: Nondestructive isolation of mesenchymal stem cells from bone marrow using DNA aptamers
Source: Royal Society of Chemistry journal article supplement (doi:10.1039/d2an01086k), 2022-01-01
Supplement: d2an01086k1.pdf [file d2an01086k1.pdf]

## Supplementary Information

### Nondestructive Isolation of Mesenchymal Stem Cells from Bone Marrow Using DNA Aptamers

*Xiaohong Wen<sup>a, †</sup>, Yujian Zou<sup>b, †</sup>, Lie Li<sup>a</sup>, Hemin Nie<sup>b, \*</sup>, Kemin Wang<sup>a</sup>, Jie Wang<sup>a</sup>,  
Suping Li<sup>a</sup>, Mei Yang<sup>a</sup> and Qiuping Guo<sup>a, \*</sup>*

<sup>a</sup> College of Biology, State Key Laboratory of Chemo/Biosensing and Chemometrics, College of Chemistry and Chemical Engineering, Hunan University, Key Laboratory for Bio-Nanotechnology and Molecule Engineering of Hunan Province, Changsha 410082, China

<sup>b</sup> Department of Biomedical Engineering, College of Biology, Hunan University, Changsha 410082, China

\* To whom correspondence should be addressed. Tel: 86-731-88821566; Fax: 86-731-88821566; E-mail: guoqing@hnu.edu.cn. Correspondence may also be addressed to Hemin Nie. E-mail: niehemin@hnu.edu.cn.

## **Contents**

Table S1. List of Apt-W2 and complementary sequences.

Table S2. Primers sequence for qPCR detection.

Figure S1. The binding ability of aptamers to mBMSCs at different pages.

Figure S2. The affinity of aptamer W2 against different cell lines.

Figure S3. The affinity of aptamers against different mesenchymal stem cell lines.

Figure S4. The binding properties of Apt-W2 to C3H10T1/2 cells.

Figure S5. Secondary structural analysis of aptamer.

Figure S6. The loading capacity of magnetic beads for DNA aptamer.

Figure S7. The affinity between Apt-W2 and MSCs.

Figure S8. Effect of temperature on the binding of Apt-W2 to MSCs.

Figure S9. Cell sorting experiment for artificial mixed C3H10T1/2 and 3T3 cells.

**Supporting Tables:**

**Table S1. List of Apt-W2 and complementary sequences.**

| Name                                    | Sequence                                                                                 |
|-----------------------------------------|------------------------------------------------------------------------------------------|
| Apt-W2                                  | 5'-Cy5-<br>CCACTGACTACCAAGGGAGTGTTGCGCTATTATGTAAATGT<br>CGTGTACGTTGAAGTCAGTCGG-Biotin-3' |
| complementary<br>sequences of<br>Apt-W2 | 5'-<br>CCGACTGACTTCAACGTACACGACATTTACATAATAGCGCA<br>ACACTCCCTTGGTAGTCAGTGG-3'            |

**Table S2. Primers sequence for qPCR detection.**

| Gene name | Forward primer (5'-3') | Reverse primer (5'-3') |
|-----------|------------------------|------------------------|
| Gapdh     | ACTTCAACAGCAACTCCCCTC  | TAGGCCCCTCCTGTTATTATGG |
| Cd29      | CTCCGGCCAGAAGACATTAC   | GCCAATGCGGAAGTCTGAAG   |
| Cd73      | TAGAGCAGACCAGCGATGAC   | CAGTGCCATAGCATCGTAGC   |
| Cd105     | TGCGTGAAGTCCACGTTCTC   | TCCTGGAGGTAAGGGATGGT   |
| Lif       | TCAATGGCAGCGCCAATGCT   | CGGTACTTGTTGCACAGACG   |
| Nanog     | TCAGCCTCCAGCAGATGCAA   | AGGCTTCCAGATGCGTTCAC   |
| Oct4      | CCTTGCAGCTCAGCCTTAAG   | GCTGATTGGCGATGTGAGTG   |
| E4f1      | CGTTCACCTGCACACAGTGT   | GGTGTGTCCGGAAGTGTACT   |
| Cdkn2d    | GGCCTTGCAGGTCATGATGT   | AGGAGCTAGGAAGCTGACCA   |
| Ccnd1     | TCTGTGAGGAGCAGAAGTGC   | CCAGGTTCCACTTGAGCTTG   |

**Supporting Figures:**

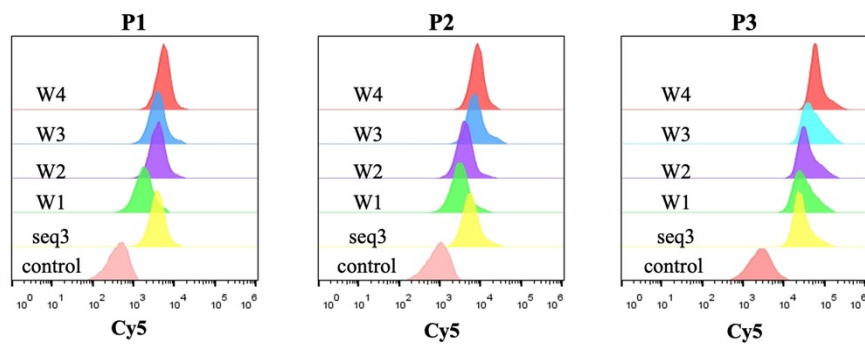

**Figure S1.** Flow cytometric assay for the binding ability of the Cy5-labeled aptamers against mBMSC cells at different pages.

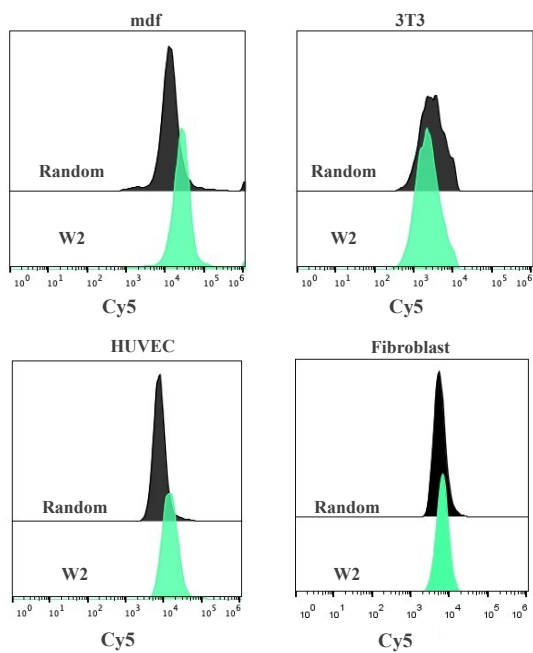

**Figure S2.** Flow cytometric assay for the selectivity of the Cy5-labeled truncated aptamer W2 against different cell lines.

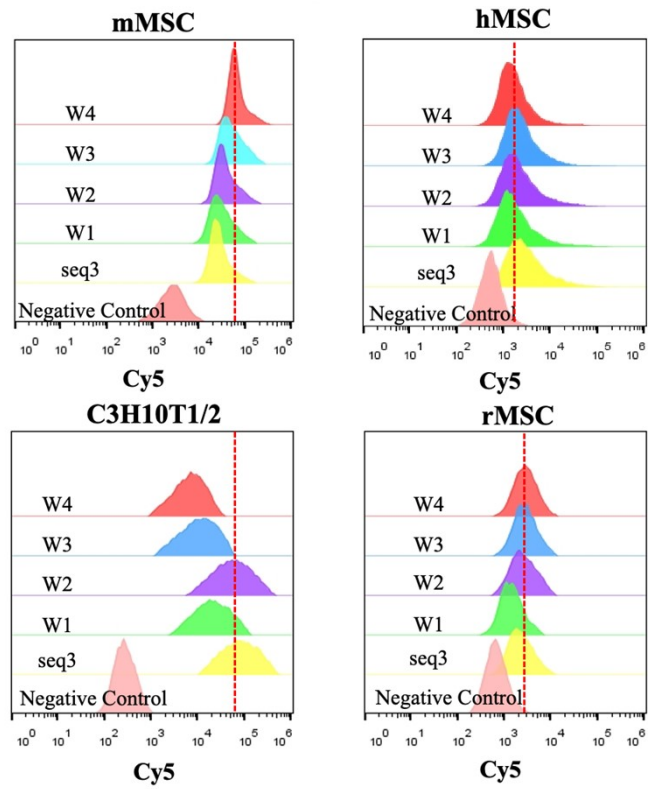

**Figure S3.** Flow cytometric assay for the a of the Cy5-labeled truncated aptamers against different mesenchyma stem cell lines.

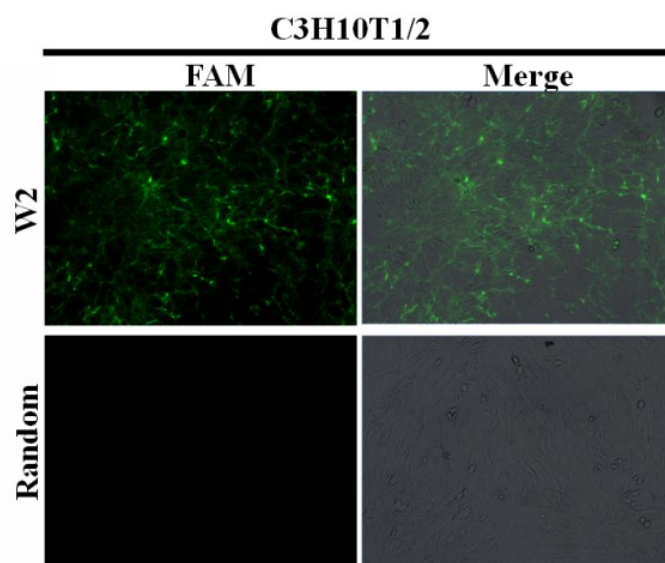

**Figure S4.** Fluorescence images of binding of FAM-labeled W2 (250 nmol/L) to C3H10T1/2 cells. The fluorescence signal was detected by a 10 × objective (fluorescence channel: EX 495 nm, EM 520 nm long-pass).



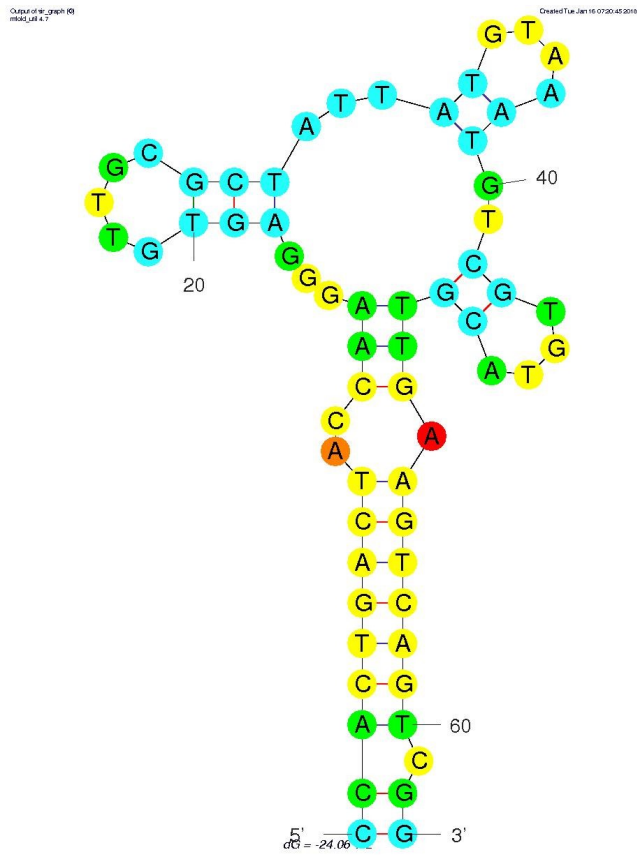

**Figure S5.** Secondary structural analysis of Apt-W2.

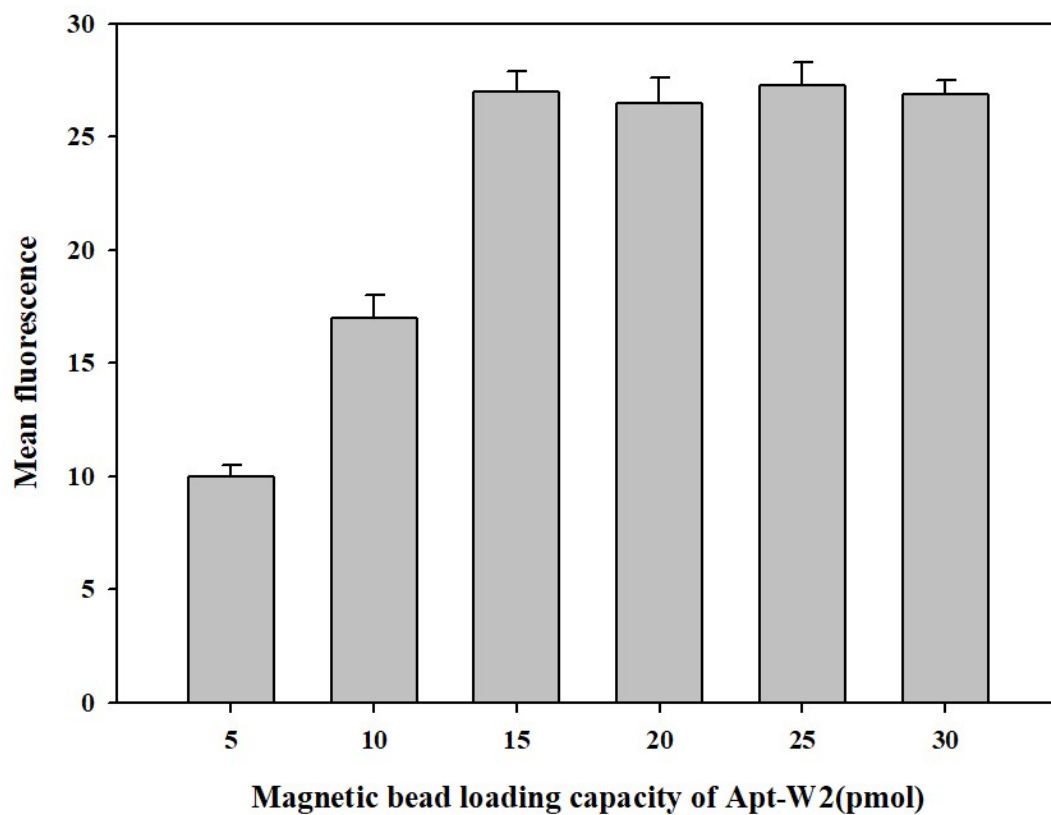

**Figure S6.** The loading capacity of magnetic beads for DNA aptamer. The amount of magnetic beads was fixed at 0.05 mg, when 15 pmol Apt-W2 was put in, the loading capacity of magnetic beads reached saturation.

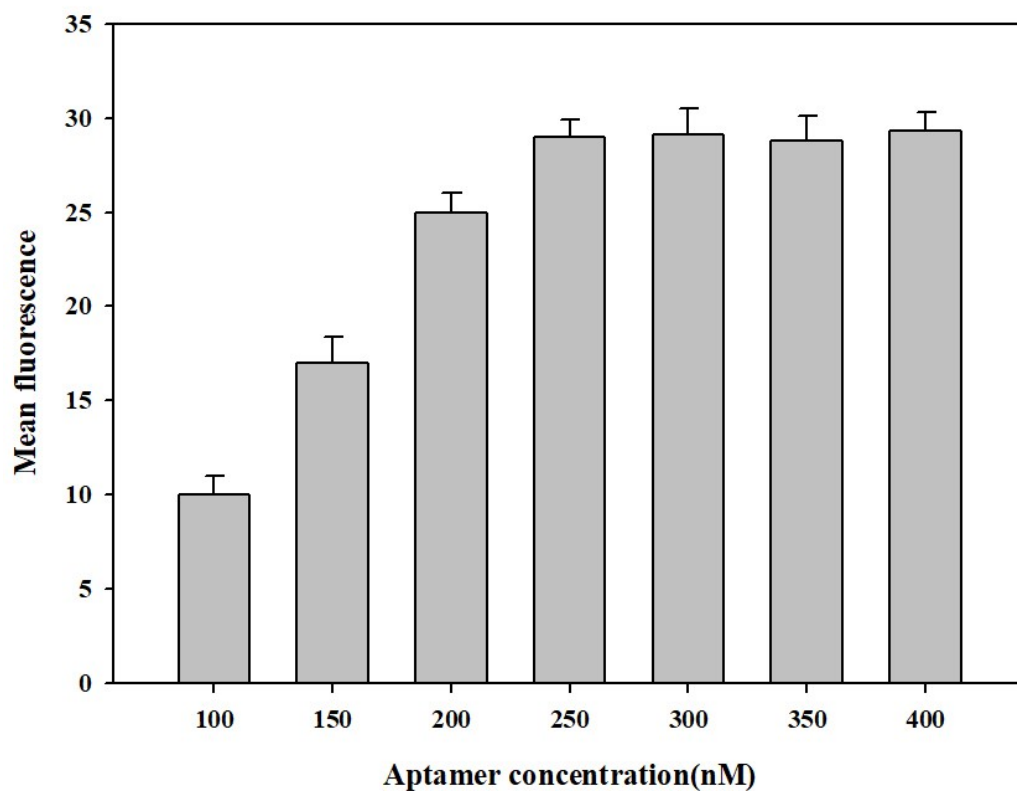

**Figure S7.** The affinity between Apt-W2 and target cells. When the Apt-W2 concentration was 250 nM, the affinity reached saturated.

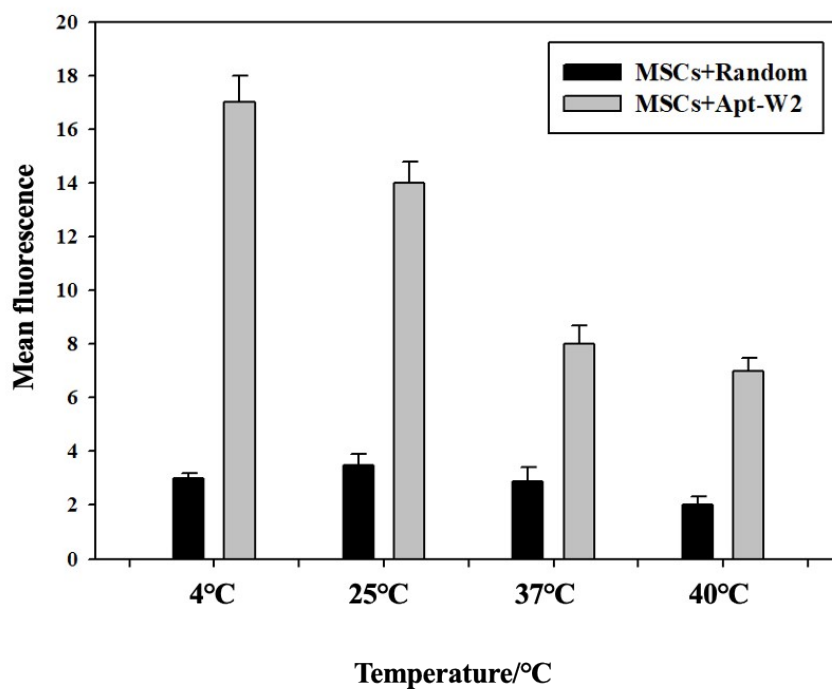

**Figure S8.** Effect of temperature on the binding of Apt-W2 to MSCs. Apt-W2 were incubated with MSCs at 4°C, 25°C, 37°C and 40°C respectively.

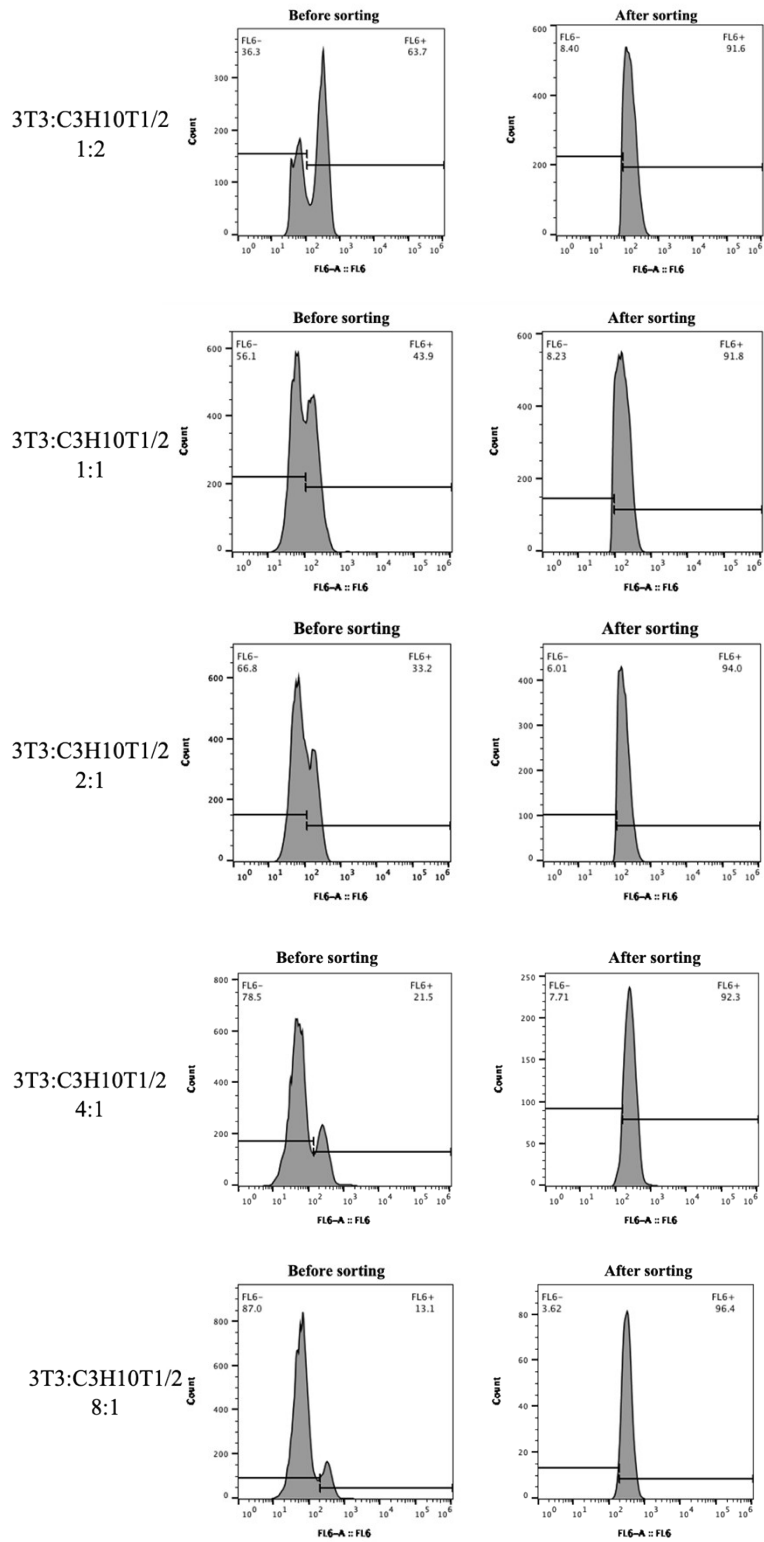

**Figure S9.** The cell sorting experiment for artificial mixed C3H10T1/2 and 3T3 cells, and the proportion (C3H10T1/2: 3T3) of mixed cells were 2:1, 1:1, 1:2, 1:4 and 1:8 respectively.
